# Supplementary material for: Lower carbohydrate diets and all-cause and cause-specific mortality: a population-based cohort study and pooling of prospective studies
Source: Oxford University Press journal article supplement (doi:10.1093/eurheartj/ehz174), 2019-04-08
Supplement: eurheartj_40_34_2870_s5.doc [file eurheartj_40_34_2870_s5.doc]

**Table S1:** MOOSE Checklist for Meta-analyses of Observational Studies

| **Item No** | **Recommendation** | **Reported on Page No** |
| --- | --- | --- |
| Reporting of background should include | | |
| 1 | Problem definition | 3 |
| 2 | Hypothesis statement | 4 |
| 3 | Description of study outcome(s) | 5 |
| 4 | Type of exposure or intervention used | 5 |
| 5 | Type of study designs used | 5 |
| 6 | Study population | 5 |
| Reporting of search strategy should include | | |
| 7 | Qualifications of searchers (eg, librarians and investigators) | 5 |
| 8 | Search strategy, including time period included in the synthesis and key words | 5,6, Suppl. Table 2 |
| 9 | Effort to include all available studies, including contact with authors | 5,6 |
| 10 | Databases and registries searched | 5,6, Suppl. Table 2 |
| 11 | Search software used, name and version, including special features used (eg, explosion) | 5,6 |
| 12 | Use of hand searching (eg, reference lists of obtained articles) | 5,6, Suppl. Table 2 |
| 13 | List of citations located and those excluded, including justification | 5,6 |
| 14 | Method of addressing articles published in languages other than English | 5,6 |
| 15 | Method of handling abstracts and unpublished studies | 5,6 |
| 16 | Description of any contact with authors | 5,6 |
| Reporting of methods should include | | |
| 17 | Description of relevance or appropriateness of studies assembled for assessing the hypothesis to be tested | 6,7 |
| 18 | Rationale for the selection and coding of data (eg, sound clinical principles or convenience) | 6,7 |
| 19 | Documentation of how data were classified and coded (eg, multiple raters, blinding and interrater reliability) | 6,7 |
| 20 | Assessment of confounding (eg, comparability of cases and controls in studies where appropriate) | 6,7 |
| 21 | Assessment of study quality, including blinding of quality assessors, stratification or regression on possible predictors of study results | 6-8, Suppl. Table 3 |
| 22 | Assessment of heterogeneity | 6-8 |
| 23 | Description of statistical methods (eg, complete description of fixed or random effects models, justification of whether the chosen models account for predictors of study results, dose-response models, or cumulative meta-analysis) in sufficient detail to be replicated | 6-8 |
| 24 | Provision of appropriate tables and graphics | 6,7 |
| Reporting of results should include | | |
| 25 | Graphic summarizing individual study estimates and overall estimate | Figures 4-6; Suppl. Figures 1-3 |
| 26 | Table giving descriptive information for each study included | Table 1 |
| 27 | Results of sensitivity testing (eg, subgroup analysis) | 10; Suppl. Figures 4,5 |
| 28 | Indication of statistical uncertainty of findings | 10,11; Suppl. Figures 4,5 |

| **Item No** | **Recommendation** | **Reported on Page No** |
| --- | --- | --- |
| Reporting of discussion should include | | |
| 29 | Quantitative assessment of bias (eg, publication bias) | 10,11; Suppl. Figures 4,5 |
| 30 | Justification for exclusion (eg, exclusion of non-English language citations) | 10,11 |
| 31 | Assessment of quality of included studies | 10,11; Suppl. Figures 4,5 Suppl. Table 3 |
| Reporting of conclusions should include | | |
| 32 | Consideration of alternative explanations for observed results | 11-14 |
| 33 | Generalization of the conclusions (ie, appropriate for the data presented and within the domain of the literature review) | 11-14 |
| 34 | Guidelines for future research | 11-14 |
| 35 | Disclosure of funding source | 15 |

*From*: Stroup DF, Berlin JA, Morton SC, et al, for the Meta-analysis Of Observational Studies in Epidemiology (MOOSE) Group. Meta-analysis of Observational Studies in Epidemiology. A Proposal for Reporting. *JAMA*. 2000;283(15):2008-2012. doi: 10.1001/jama.283.15.2008.

Transcribed from the original paper within the NEUROSURGERY® Editorial Office, Atlanta, GA, United Sates. August 2012.

| **Table S2.** Full search terms and strategy for papers indexed in PUBMED. | | |
| --- | --- | --- |
| **No** | **Concept** | **Search terms** |
| **1** | **Low-Carbohydrate Diet** | low-carbohydrate diet [Mesh] OR carbohydrate-restricted diet’[Mesh] OR low carbohydrate diet[Mesh] OR Low-carbohydrate-diet[Mesh] |
| **2** | **Cancer** | “neoplasms”[Text Word] OR “neoplasia”[Text Word] OR “cancer”[Text Word] OR “tumor”[Text Word] OR “tumour”[Text Word] |
| **3** | **Mortality** | mortality[tiab] OR death*[tiab] OR dead[tiab] OR all-cause[tiab] OR all cause[tiab] OR fatal[tiab] OR event[tiab] OR nonfatal[tiab] OR non-fatal[tiab] OR Mortality[Mesh:NoExp] OR mortality[Mesh subheading] |
| **4** | **Cardiovascular** | cardiovascular[tiab] OR vascular[tiab] OR CVD[tiab] OR Cardiovascular Diseases[Mesh:NoExp] |
| **5** | **Stroke** | cerebrovascular[tiab] OR stroke[tiab] OR TIA[tiab] OR transient ischemic*[tiab] OR CVA[tiab] OR cerebral infarction[tiab] OR Cerebrovascular accident [Mesh:NoExp] OR stroke[Mesh:NoExp] |
| **6** | **Combination** | #2 OR #3 OR #4 OR #5 |
| **7** | **Combination Exposure And Outcome** | #1 AND #6 |
| **8** | **Limit** | Rats[Mesh:NoExp]) OR Mice[Mesh:NoExp]) OR rat[Title/Abstract]) OR rats[Title/Abstract]) OR mouse[Title/Abstract]) OR mice[Title/Abstract]) OR vivo[Title/Abstract]) OR vitro[Title/Abstract]) |
| **9** | **Limit** | #7 NOT #8 |

**Table S3.** Quality assessment of selected cohorts studies.

| **Studies** | **Selection** | | | | | **Comparability** | **Outcome** | | | **Total score** |
| --- | --- | --- | --- | --- | --- | --- | --- | --- | --- | --- |
|  | | **Representativeness of the exposed cohort** | **Selection of the non-exposed cohort** | **Ascertainment of exposure** | **Outcome not present at start of study** | **Comparability of cohorts on the basis of the design or analysis** | **Assessment of outcome** | **Follow-up long enough for outcomes to occur** | **Adequacy of follow-up of cohorts** |
| ***Lagiou, 2007 (1)*** | | C | A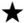 | B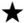 | A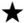 | A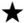 B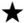 | B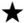 | B | B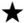 | 9 |
| ***Trichopoulou, 2007 (2)*** | | C | A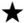 | B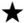 | A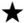 | A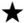 B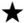 | B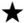 | A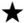 | B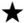 | 8 |
| ***Fung, 2010 (3)*** | | C | A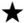 | B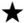 | A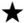 | A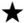 B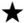 | B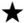 | A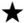 | B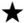 | 8 |
| ***Sjögren, 2010 (4)*** | | C | A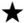 | B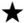 | A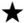 | A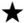 B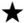 | B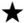 | B | B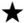 | 9 |
| ***Nilsson, 2012 (5)*** | | C | A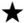 | B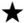 | A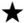 | A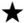 B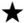 | B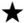 | A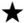 | B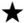 | 8 |
| ***Nakamura, 2014 (6)*** | | C | A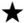 | B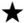 | A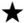 | A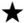 B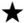 | B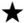 | A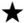 | B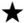 | 8 |
| ***Li, 2014 (7)*** | | C | A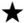 | B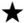 | A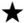 | A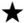 B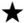 | B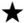 | A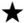 | B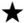 | 8 |
| ***Mazidi, 2018*** | | C | A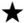 | B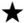 | A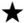 | A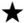 B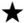 | B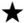 | B | B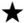 | 9 |
| ***Seidelmann, 2018 (36)*** | | C | A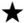 | B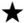 | A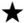 | A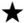 B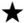 | B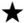 | B | B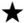 | 9 |

**NEWCASTLE – OTTAWA QUALITY ASSESSMENT SCALE COHORT STUDIES:**

Note: A study can be awarded a maximum of one star for each numbered item within the Selection and Outcome categories. A maximum of two stars can be given for Comparability.

**Selection:**

1) Representativeness of the exposed cohort

a) truly representative of the average *healthy adults* in the community
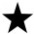


b) somewhat representative of the average *healthy adults* in the community
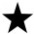


c) selected group of users *e.g. nurses, volunteers, vegetarian*

d) no description of the derivation of the cohort

2) Selection of the non-exposed cohort

a) drawn from the same community as the exposed cohort
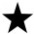


b) drawn from a different source

c) no description of the derivation of the non-exposed cohort

3) Ascertainment of exposure

a) secure record (*e.g. 7 day food diary)*
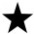


b) structured interview/≥ 2 *dietary recalls/diet history/ food frequency questionnaire validated for dairy components*
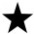


c) written self-report (*e.g. <2 dietary recalls/non-validated food frequency questionnaire or not reported whether food frequency questionnaire was validated*)

d) no description

4) Demonstration that outcome of interest was not present at start of study

a) yes
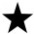


b) no

**Comparability:**

1) Comparability of cohorts on the basis of the design or analysis

a) study controls for *age, sex, smoking, total energy intake, and body mass index*
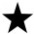


b) study controls for any additional factor (*e.g. physical activity, alcohol intake, family history of diabetes, dietary factors*)
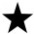


**Outcome:**

1) Assessment of outcome

a) independent blind assessment (e.g. clinical diagnosis/complete medical information available).
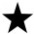


b) record linkage/*medical record or validated self-report*
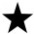


c) non-validated self-report

d) no description
2) Was follow-up long enough for outcomes to occur

**Table S4**. Characteristics of Prospective Cohort Studies included in the meta-analysis.

| **Author, year and reference** | **Country, region/cohort** | **Men (%)** | **Age** | **Follow-Up Time**  **(Years)** | **No. of**  **cases** | **No. of**  **subjects** | **Parameter** | **Outcome** | **Main confounders** |
| --- | --- | --- | --- | --- | --- | --- | --- | --- | --- |
| *Lagiou, 2007 (12)* | Sweden, Scandinavian  Women’s Lifestyle and  Health Cohort | 0 | 30-49 | 12 | 588, 75 | 42237 | Low carbohydrate Score and LCHP score | All-cause death, CVD death | Height, body mass index, smoking status, physical activity, education, energy intake, saturated lipid intake and alcohol intake. |
| *Trichopoulou, 2007 (13)* | Greece, European Prospective Investigation into Cancer | 41 | - | 4.9 | 455, 193 | 22944 | LCHP score | All-cause death, CVD death | Energy intake, gender, age, years of schooling, smoking, body mass index, physical activity, and ethanol intake. |
| *Fung, 2010 (14)* | United states, Nurses' Health Study and Health Professionals' Follow-up Study | 0, 100 | 34-59, 40–75 | 26,20 | 12555, 2458, 8678, 2746 | 85168, 44548 | Low carbohydrate  score | All-cause death, CVD death, All-cause death, CVD death | Age, physical activity, body mass index, energy intake, alcohol intake, menopausal status and postmenopausal hormone use, history of hypertension, smoking status, and multivitamin use. |
| *Sjogren, 2010 (15)* | Sweden, Uppsala | 100 | 71 | 10.1 | 215 | 924, 88 | LCHP score | All-cause death , CVD death | Energy intake, smoking, social class, type 2 diabetes, the metabolic syndrome, lipid-lowering treatment, blood pressure-lowering treatment, waist circumference, diastolic blood pressure, insulin, C-reactive protein |
| *Nilsson, 2012 (16)* | Sweden, Västerbotten Intervention Program | 49 | 49 | 10 | 2383, 681 | 77319 | LCHP score | All-cause death, CVD death | Age, body mass index, sedentary lifestyle, education, current smoking, intake of energy, alcohol, and saturated fat |
| *Nakamura, 2014 (11)* | Japan, National Integrated Project for Prospective Observation of Non-communicable Disease and Its Trends in the Aged 1980 | 48 | 51 | 29 | 3443, 1171 | 224 610 | low-carbohydrate diet | All-cause death,  CVD deaths | BMI, hypertension, cigarette smoking  and alcohol consumption, serum total cholesterol and blood glucose concentrations and serum creatinine concentrations, total dietary fibre intake, Na:K ratio and employee classes |
| *Li, 2014 (8)* | Nurses’ Health Study, USA | 44 | ---- | 8.5 | 1133, 558 | 4098 | Low-Carbohydrate Diet | All-cause death,  CVD deaths | total caloric intake, physical activity, aspirin use, diabetes, high blood pressure, lipid-lowering medication use, alcohol consumption, currently married, body mass index, CABG and pre-MI score. |
| *Mazidi, 2018* | National Health and Nutrition Examination Survey, USA | 48.6 | 47.6 | 6.4 | 3432 | 24825 | Low carbohydrate Score and LCHP score | All-cause death,  CVD deaths | sex, gender, education, marital status, poverty to income ratio, total energy intake, physical activity, smoking, alcohol consumption, body mass index, hypertension, serum total cholesterol and diabetes |
| *Seidelmann, 2018 (36)* | Atherosclerosis Risk in Communities, USA | ---- | 45–64 | 25 | 6283 | 15428 | Low-Carbohydrate Diet | All-cause death | age, race, gender, ARIC test center, total energy consumption, diabetes, cigarette smoking, physical activity, income level and education. |
| *ABBREVIATIONS: CVD: Cardiovascular disease, LC/HP: Low carbohydrate-high protein diet, CABG: Coronary artery bypass grafting, MI: Myocardial infarcts. BMI: body mass index. | | | | | | | | | |

# Figure S1. Flow chart of literature search for meta-analysis on low carbohydrate diet (LCD) with overall and cause specific mortality for the studies selection.


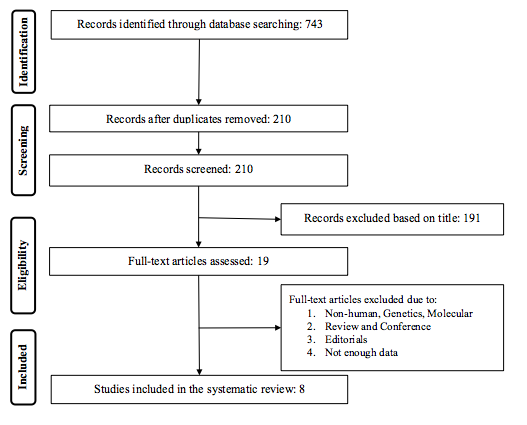


**Figure S2.** Forest plot of LC/HP and risk of overall mortality.


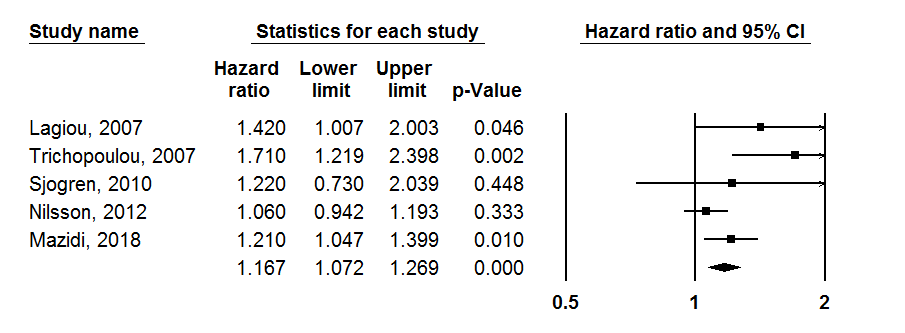


**Figure S3.** Forest plot of LC/HP and risk of CVD mortality.


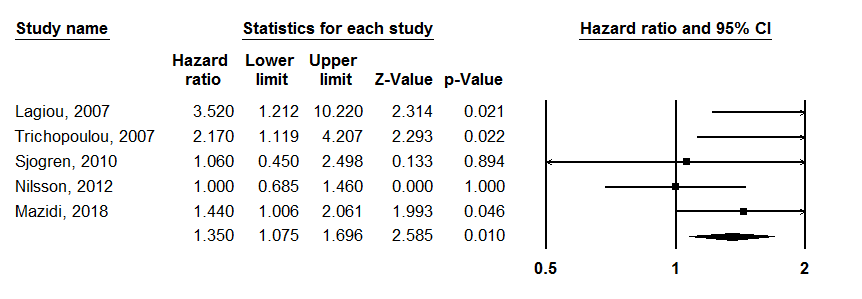


**Figure S4.** Forest plot of LC/HP and risk of cancer mortality.


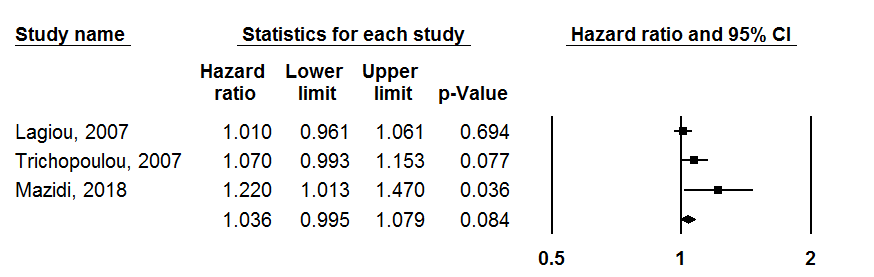


**Figure S5:** Funnel plots for studies of the association between LCD and risk of overall mortality. Open circles represent observed published studies; open diamond represents observed effect size.


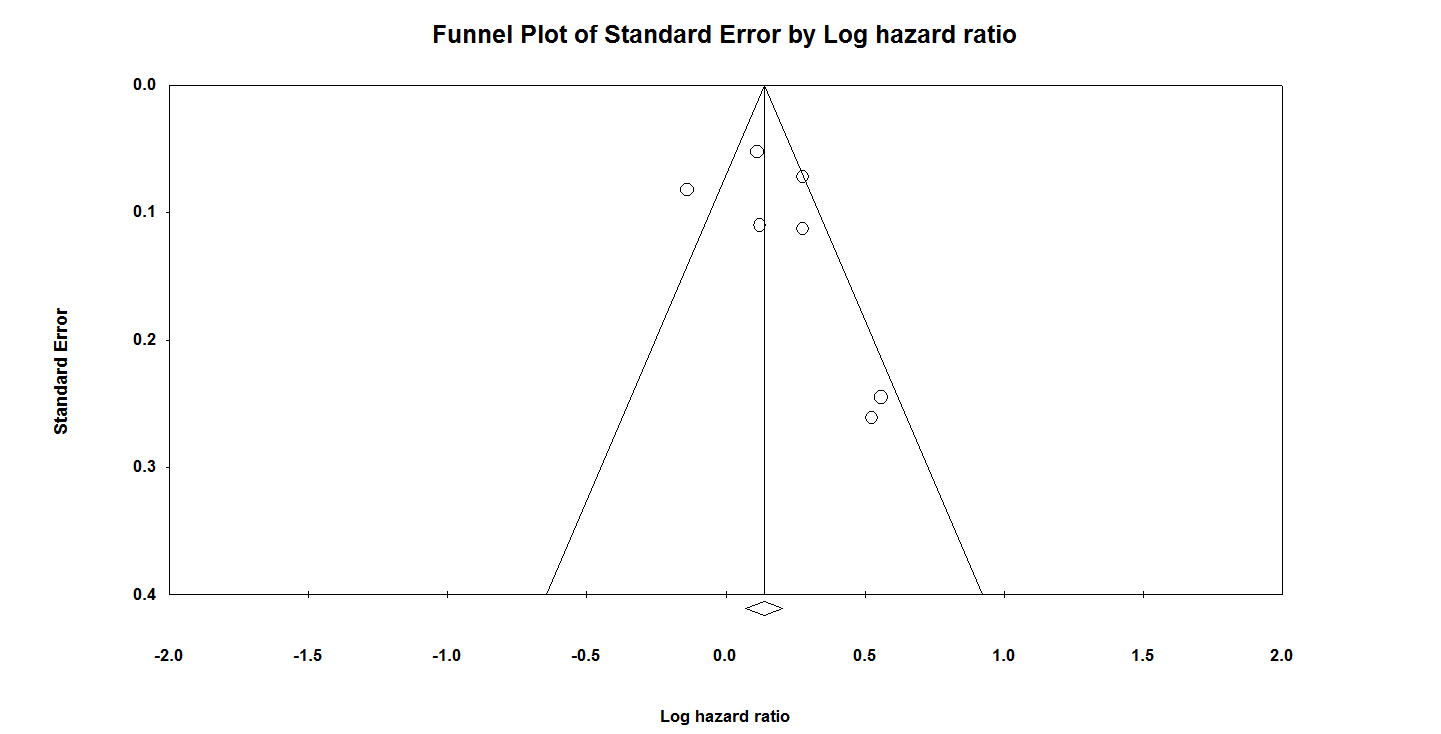


**Figure S6:** Trim and fill method was used to impute for potentially missing studies (LCD and risk of overall mortality), two potentially missing study was imputed in funnel plot. Open circles represent observed published studies; closed circles represent imputed studies; open diamond represents observed effect size; closed diamond represents imputed effect size.

**
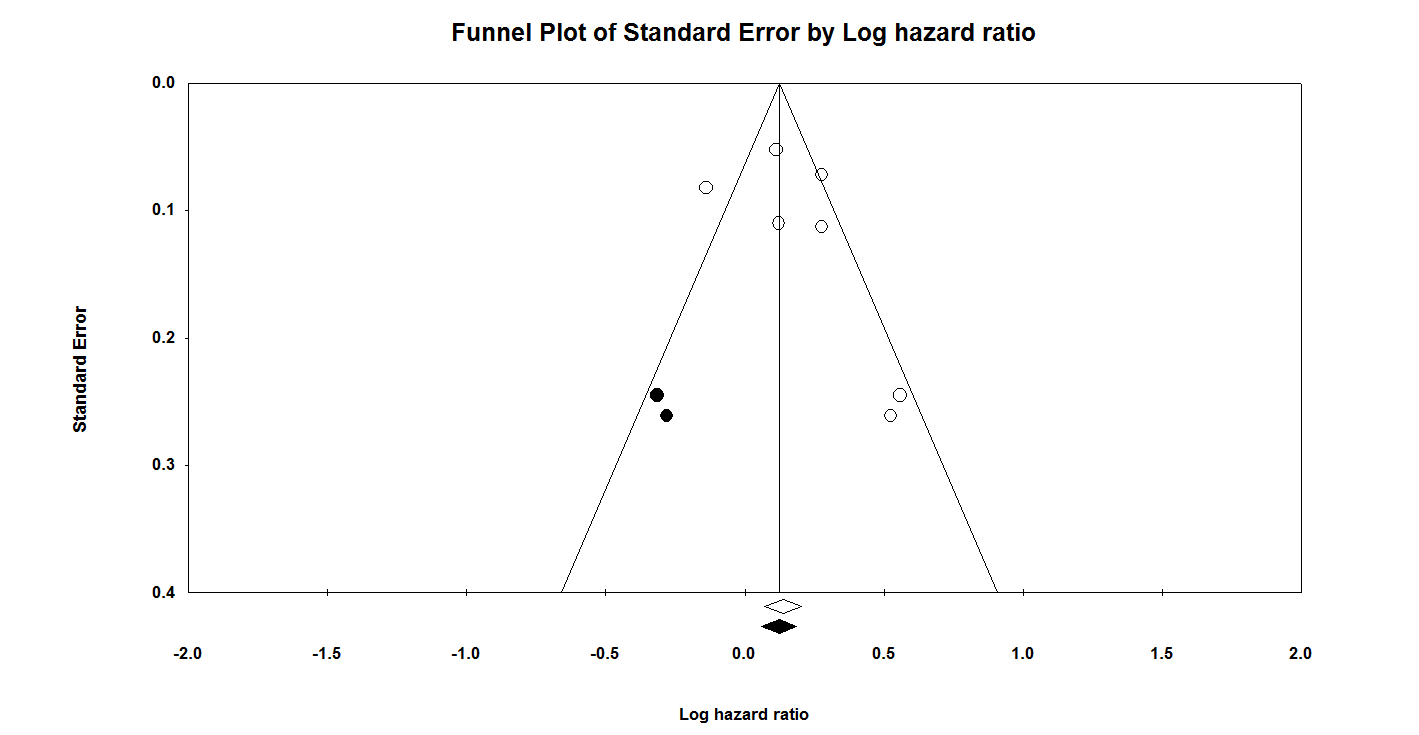
**
